# Supplementary material
Source: PubMed Central journal article supplement (PMC2766176)
Supplement: NIHMS128751-supplement-Supp_1.pdf [file NIHMS128751-supplement-Supp_1.pdf]

\*stream file for R1 topology  
 \*to be treamed after the charmm topology file  
 \*

read rtf card append  
 \* ////////////// \\\ \\\ \\\ \\\ July 4th 2006 ////////////// \\\ \\\ \\\ \\\  
 \*

27 1

MASS 200 ON 15.999400 O ! spin label O  
 MASS 201 NN 14.007000 O ! spin label N

DEFA FIRS none LAST none  
 AUTOGENERATE ANGLES DIHEDRALS

RESI R1 0.00 ! Spin Label for Proteins chi2(pot) = 0.03406

```

GROUP !
ATOM O ON -0.438! H1A
ATOM N NN 0.220! H1B\ /
ATOM C1 CTL1 0.334! C1A
ATOM C2 CTL1 0.329! | \H1C
GROUP
ATOM C1A CTL3 -0.337! | H2A
ATOM H1A HAL3 0.09 ! | H2B\ /
ATOM H1B HAL3 0.09 ! | C2A
ATOM H1C HAL3 0.09 ! | / \H2C
GROUP !
ATOM C2A CTL3 -0.335! | O
ATOM H2A HAL3 0.09 ! \ | /
ATOM H2B HAL3 0.09 ! \ N /
ATOM H2C HAL3 0.09 ! \ / \ /
C1 C2 -----
GROUP
ATOM C1D CTL3 -0.337! / | | \
ATOM H1D HAL3 0.09 ! / C1R==C2R-H2R \
ATOM H1E HAL3 0.09 ! | | |
ATOM H1F HAL3 0.09 ! | | |
GROUP
ATOM C2D CTL3 -0.335! | | | /H2D
ATOM H2D HAL3 0.09 ! | \ C2D
ATOM H2E HAL3 0.09 ! | \ H2E/ \
ATOM H2F HAL3 0.09 ! | | H2F
GROUP
ATOM C1R CEL1 -0.003! H1D\ | |
ATOM C2R CEL1 -0.340! C1D | |
ATOM H2R HEL1 0.162! / \H1E | |
GROUP !
ATOM C1L CTL2 -0.10 ! H1F | |
ATOM H1L HAL2 0.09 ! - C1L -
ATOM H1M HAL2 0.09 ! | |
ATOM S1L SM -0.08 ! S1L
GROUP !
ATOM S2L SM -0.08 ! S2L
ATOM C2L CTL3 -0.19 ! | |
ATOM H2L HAL3 0.09 ! C2L
ATOM H2M HAL3 0.09 ! / | \
ATOM H2N HAL3 0.09 ! H2L H2M H2N
DOUBLE C1R C2R
  
```

```

BOND O N
BOND N C1 N C2
BOND C1A C1 C1D C1
BOND C2A C2 C2D C2
BOND H1A C1A H1B C1A H1C C1A
BOND H1D C1D H1E C1D H1F C1D
BOND H2A C2A H2B C2A H2C C2A
BOND H2D C2D H2E C2D H2F C2D
BOND C1 C1R C2 C2R H2R C2R
BOND C1L C1R
BOND H1L C1L H1M C1L C1L S1L
BOND S1L S2L S2L C2L
BOND C2L H2L C2L H2M C2L H2N
IMPR C2 C1R C2R H2R
IMPR C1 C2R C1R C1L
CMAP C2R C1R C1L S1L C1R C1L S1L S2L

```

ACCEPTOR O N

|    |     |     |     |     |        |        |         |        |        |
|----|-----|-----|-----|-----|--------|--------|---------|--------|--------|
| IC | C1R | C1  | N   | C2  | 1.5278 | 98.53  | -1.45   | 116.77 | 1.4647 |
| IC | C1  | N   | C2  | C2R | 1.4662 | 116.77 | 1.60    | 99.75  | 1.5086 |
| IC | N   | C2  | C2R | C1R | 1.4647 | 99.75  | -1.06   | 112.12 | 1.3357 |
| IC | C2  | C2R | C1R | C1  | 1.5086 | 112.12 | 0.26    | 112.81 | 1.5278 |
| IC | C2R | C1R | C1  | N   | 1.3357 | 112.81 | 0.67    | 98.53  | 1.4662 |
| IC | C1R | C1  | N   | O   | 1.5278 | 98.53  | 178.95  | 121.79 | 1.2905 |
| IC | C2R | C1R | C1  | C1A | 1.3357 | 112.81 | -115.07 | 114.52 | 1.5406 |
| IC | C2R | C1R | C1  | C1D | 1.3357 | 112.81 | 115.60  | 112.69 | 1.5415 |
| IC | C2A | C2  | C2R | C1R | 1.5369 | 111.79 | 115.05  | 112.12 | 1.3357 |
| IC | C2D | C2  | C2R | C1R | 1.5373 | 111.69 | -117.01 | 112.12 | 1.3357 |
| IC | C1L | C1R | C1  | N   | 1.5092 | 121.37 | -178.90 | 98.53  | 1.4662 |
| IC | C1L | C1R | C2R | C2  | 1.5092 | 125.82 | 179.81  | 112.12 | 1.5086 |
| IC | C1  | C1R | C1L | S1L | 1.5088 | 116.75 | 79.83   | 108.84 | 1.8702 |
| IC | C2R | C1R | C1L | S1L | 1.3382 | 120.56 | -99.58  | 108.84 | 1.8702 |
| IC | C1R | C1L | S1L | S2L | 1.5078 | 108.84 | -164.49 | 103.76 | 2.0813 |
| IC | C1L | S1L | S2L | C2L | 1.8702 | 103.76 | 88.88   | 103.36 | 1.8366 |

PRES LKR1 -0.36 ! Patch must be 1-CYS and 2-R1.

GROUP ! use in a patch statement

ATOM 1CB CT2 -0.10 !  
 ATOM 1SG SM -0.08 ! 2S1L--2C1L--

GROUP ! | / |

ATOM 2S1L SM -0.08 ! -1CB--1SG

ATOM 2C1L CTL2 -0.10 ! |

DELETE ATOM 1HG1

DELETE ATOM 2S2L

DELETE ATOM 2C2L

DELETE ATOM 2H2L

DELETE ATOM 2H2M

DELETE ATOM 2H2N

BOND 1SG 2S1L

ANGLE 1CB 1SG 2S1L 1SG 2S1L 2C1L

DIHE 1HB1 1CB 1SG 2S1L 1HB2 1CB 1SG 2S1L

DIHE 2H1L 2C1L 2S1L 1SG 2H1M 2C1L 2S1L 1SG

DIHE 1CA 1CB 1SG 2S1L 1SG 2S1L 2C1L 2C1R

DIHE 1SG 2S1L 2C1L 2H1L 1SG 2S1L 2C1L 2H1M

DIHE 1CB 1SG 2S1L 2C1L

CMAP 2C2R 2C1R 2C1L 2S1L 2C1R 2C1L 2S1L 1SG

IC 1CA 1CB 1SG 2S1L 0.0000 0.0000 180.0000 0.0000 0.0000

|    |     |      |      |      |        |        |          |        |        |
|----|-----|------|------|------|--------|--------|----------|--------|--------|
| IC | 1CB | 1SG  | 2S1L | 2C1L | 0.0000 | 0.0000 | 90.0000  | 0.0000 | 0.0000 |
| IC | 1SG | 2S1L | 2C1L | 2C1R | 0.0000 | 0.0000 | 180.0000 | 0.0000 | 0.0000 |

END
