# Supplementary material
Source: PubMed Central journal article supplement (PMC2766176)
Supplement: NIHMS128751-supplement-Supp_2.pdf [file NIHMS128751-supplement-Supp_2.pdf]

\*stream file for R1 parameters  
\*stream after the charmm param27 file  
\*

read param card append  
\* SLX  
\*

BONDS

|      |      |        |       |   |   |   |   |   |   |
|------|------|--------|-------|---|---|---|---|---|---|
| NN   | ON   | 485.17 | 1.264 | ! | H | R | T | P | 1 |
| NN   | CTL1 | 182.65 | 1.444 | ! | H | R | T | P | 1 |
| CEL1 | CTL1 | 240.00 | 1.502 | ! |   |   |   |   |   |

ANGLES

|          |      |      |        |          |        |       |          |          |            |            |
|----------|------|------|--------|----------|--------|-------|----------|----------|------------|------------|
| CTL1     | NN   | ON   | 45.12  | 115.52   | !      | H     | R        | T        | P          | 1          |
| CTL1     | NN   | CTL1 | 38.60  | 119.08   | !      | H     | R        | T        | P          | 1          |
| NN       | CTL1 | CTL3 | 51.55  | 104.19   | !      | H     | R        | T        | P          | 3          |
| NN       | CTL1 | CTL2 | 51.55  | 104.19   | !      | -     | -        | -        | -          | 0          |
| NN       | CTL1 | CTL1 | 51.55  | 104.19   | !      | -     | -        | -        | -          | 0          |
| NN       | CTL1 | CEL1 | 64.23  | 103.75   | !      | X     | X        | X        | P          | 1          |
| CTL1     | CEL1 | CTL2 | 45.15  | 112.75   | !      | X     | X        | X        | P          | 2          |
| CTL1     | CEL1 | CTL3 | 45.15  | 112.75   | !      | -     | -        | -        | -          | 0          |
| HEL1     | CEL1 | CTL1 | 30.66  | 103.41   | !      | X     | X        | X        | P          | 1          |
| CTL3     | CTL1 | CEL1 | 32.49  | 112.20   | !      |       |          |          |            |            |
| CEL1     | CEL1 | CTL1 | 48.00  | 123.50   | !      |       |          |          |            |            |
| !        |      |      |        |          |        |       |          |          |            |            |
| !        | CTL2 | CTL1 | CTL2   | 58.350   | 113.50 | 11.16 | 2.561    | !        | glycerol   |            |
| CTL3     | CTL1 | CTL3 | 58.350 | 113.50   | 11.16  | 2.561 | !        | glycerol |            |            |
| !link    |      |      |        |          |        |       |          |          |            |            |
| SM       | CTL2 | CEL1 | 58.000 | 112.5000 | !      | ALLOW | ALI      | SUL      | ION        |            |
| CTL3     | CEL1 | CTL2 | 42.63  | 112.34   | !      | X     | X        | X        | P          | 2          |
| !        |      |      |        |          |        |       |          |          |            |            |
| !compare |      |      |        |          |        |       |          |          |            |            |
| !        | HEL1 | CEL1 | CTL2   | 40.00    | 116.00 | !     | from     | propene, | yin,adm    | jr., 12/95 |
| !        | HEL1 | CEL1 | CTL3   | 22.00    | 117.00 | !     | propene, | yin,adm  | jr., 12/95 |            |

DIHEDRALS

|      |      |      |      |        |   |      |   |   |   |   |   |   |
|------|------|------|------|--------|---|------|---|---|---|---|---|---|
| ON   | NN   | CTL1 | CTL3 | 0.099  | 3 | 0.00 | ! | H | R | T | P | 3 |
| ON   | NN   | CTL1 | CTL2 | 0.099  | 3 | 0.00 | ! | - | - | - | - | 0 |
| ON   | NN   | CTL1 | CTL1 | 0.099  | 3 | 0.00 | ! | - | - | - | - | 0 |
| ON   | NN   | CTL1 | CEL1 | 0.052  | 3 | 0.00 | ! | X | X | X | P | 1 |
| HAL3 | CTL3 | CTL1 | NN   | 0.093  | 3 | 0.00 | ! | H | R | T | P | 2 |
| HAL2 | CTL2 | CTL1 | NN   | 0.093  | 3 | 0.00 | ! | - | - | - | - | 0 |
| NN   | CTL1 | CTL1 | CTL2 | 0.481  | 3 | 0.00 | ! | X | R | X | X | 2 |
| NN   | CTL1 | CTL1 | CTL3 | 0.481  | 3 | 0.00 | ! | - | - | - | - | 0 |
| CTL3 | CTL1 | CTL2 | CTL2 | 0.151  | 3 | 0.00 | ! | H | R | X | X | 2 |
| CTL3 | CTL1 | CTL2 | CTL1 | 0.151  | 3 | 0.00 | ! | - | - | - | - | 0 |
| HAL3 | CTL3 | CTL1 | CTL2 | 0.046  | 3 | 0.00 | ! | H | R | T | X | 2 |
| HAL3 | CTL3 | CTL1 | CTL1 | 0.046  | 3 | 0.00 | ! | - | - | - | - | 0 |
| NN   | CTL1 | CTL2 | CTL2 | 0.593  | 3 | 0.00 | ! | H | R | X | X | 2 |
| NN   | CTL1 | CTL2 | CTL1 | 0.593  | 3 | 0.00 | ! | - | - | - | - | 0 |
| CTL1 | CTL1 | CTL2 | CTL1 | 1.368  | 3 | 0.00 | ! | X | R | X | X | 1 |
| CTL3 | CTL1 | CTL1 | CTL2 | 0.104  | 3 | 0.00 | ! | X | R | X | X | 2 |
| CTL3 | CTL1 | CTL1 | CTL3 | 0.104  | 3 | 0.00 | ! | - | - | - | - | 0 |
| NN   | CTL1 | CEL1 | CEL1 | 3.178  | 3 | 0.00 | ! | X | X | X | P | 1 |
| NN   | CTL1 | CEL1 | CTL3 | -0.312 | 3 | 0.00 | ! | X | X | X | P | 2 |
| NN   | CTL1 | CEL1 | CTL2 | -0.312 | 3 | 0.00 | ! | - | - | - | - | 0 |

|                       |      |      |      |        |   |        |   |                                |      |      |      |            |
|-----------------------|------|------|------|--------|---|--------|---|--------------------------------|------|------|------|------------|
| NN                    | CTL1 | CEL1 | HEL1 | 2.165  | 3 | 0.00   | ! | X                              | X    | X    | P    | 1          |
| CTL3                  | CEL1 | CTL1 | CTL3 | 0.308  | 3 | 0.00   | ! | X                              | X    | X    | P    | 2          |
| CTL2                  | CEL1 | CTL1 | CTL3 | 0.308  | 3 | 0.00   | ! | -                              | -    | -    | -    | 0          |
| CEL1                  | CEL1 | CTL1 | CTL3 | 0.500  | 1 | 180.00 | ! |                                |      |      |      |            |
| CEL1                  | CEL1 | CTL1 | CTL3 | 1.300  | 3 | 180.00 | ! |                                |      |      |      |            |
| !CTL1                 | CEL1 | CEL1 | CTL1 | 0.226  | 2 | 0.00   | ! | X                              | X    | X    | P    | 1          |
| !CTL1                 | CEL1 | CEL1 | CTL2 | 0.247  | 2 | 180.00 | ! | X                              | X    | X    | P    | 2          |
| !CTL1                 | CEL1 | CEL1 | CTL3 | 0.247  | 2 | 180.00 | ! | -                              | -    | -    | -    | 0          |
| !use                  |      |      |      |        |   |        |   |                                |      |      |      |            |
| !X                    | CEL1 | CEL1 | X    | 0.1500 | 1 | 0.00   | ! | 2-butene, adm jr., 2/00 update |      |      |      |            |
| !X                    | CEL1 | CEL1 | X    | 8.5000 | 2 | 180.00 | ! | 2-butene, adm jr., 2/00 update |      |      |      |            |
| !zeros                |      |      |      |        |   |        |   |                                |      |      |      |            |
| CTL1                  | NN   | CTL1 | CTL3 | 0.0    | 3 | 0.00   | ! | H                              | R    | T    | P    | 2          |
| CTL1                  | NN   | CTL1 | CTL2 | 0.0    | 3 | 0.00   | ! | -                              | -    | -    | -    | 0          |
| CTL1                  | NN   | CTL1 | CTL1 | 0.0    | 3 | 0.00   | ! | X                              | R    | X    | X    | 1          |
| CTL1                  | NN   | CTL1 | CEL1 | 0.0    | 3 | 0.00   | ! | X                              | X    | X    | P    | 1          |
| HAL3                  | CTL3 | CTL1 | CEL1 | 0.0    | 3 | 0.00   | ! | X                              | X    | X    | P    | 1          |
| !HAL2                 | CTL2 | CEL1 | CTL1 | 0.617  | 3 | 0.00   | ! | X                              | X    | X    | P    | 1          |
| !compare from cholest |      |      |      |        |   |        |   |                                |      |      |      |            |
| !HAL3                 | CTL3 | CEL1 | CTL1 | 0.0300 | 3 | 0.0    | ! | HAL2                           | CTL2 | CEL1 | CTL1 | 0.03 3 0.0 |
| !                     |      |      |      |        |   |        |   |                                |      |      |      |            |
| !link                 |      |      |      |        |   |        |   |                                |      |      |      |            |
| !HAL3                 | CTL3 | CEL1 | CTL1 | 0.090  | 3 | 0.00   | ! | X                              | X    | X    | P    | X 1        |
| !SCAN-DIHEDRALS       |      |      |      |        |   |        |   |                                |      |      |      |            |
| SM                    | CTL2 | CEL1 | CEL1 | -0.274 | 1 | 0.00   | ! | X                              | X    | X    | P    | X 1        |
| SM                    | CTL2 | CEL1 | CEL1 | 0.220  | 2 | 0.00   | ! | X                              | X    | X    | P    | X 1        |
| SM                    | CTL2 | CEL1 | CEL1 | -0.105 | 3 | 0.00   | ! | X                              | X    | X    | P    | X 1        |
| SM                    | CTL2 | CEL1 | CTL1 | 0.145  | 1 | 0.00   | ! | X                              | X    | X    | P    | X 1        |
| SM                    | CTL2 | CEL1 | CTL1 | -0.049 | 2 | 0.00   | ! | X                              | X    | X    | P    | X 1        |
| SM                    | CTL2 | CEL1 | CTL1 | 0.048  | 3 | 0.00   | ! | X                              | X    | X    | P    | X 1        |
| HAL2                  | CTL2 | CEL1 | CTL1 | -0.029 | 1 | 0.00   | ! | X                              | X    | X    | P    | X 1        |
| HAL2                  | CTL2 | CEL1 | CTL1 | 0.135  | 2 | 0.00   | ! | X                              | X    | X    | P    | X 1        |
| HAL2                  | CTL2 | CEL1 | CTL1 | 0.000  | 3 | 0.00   | ! | X                              | X    | X    | P    | X 1        |
| SM                    | SM   | CTL2 | CEL1 | 0.063  | 3 | 0.00   | ! | X                              | X    | X    | P    | X 1        |
| SM                    | CT2  | CT1  | NH1  | -0.066 | 1 | 0.00   | ! | X                              | X    | X    | X    | A 1        |
| SM                    | CT2  | CT1  | NH1  | 0.053  | 2 | 0.00   | ! | X                              | X    | X    | X    | A 1        |
| SM                    | CT2  | CT1  | NH1  | 0.237  | 3 | 0.00   | ! | X                              | X    | X    | X    | A 1        |
| SM                    | CT2  | CT1  | C    | 0.233  | 1 | 0.00   | ! | X                              | X    | X    | X    | A 1        |
| SM                    | CT2  | CT1  | C    | -0.005 | 2 | 0.00   | ! | X                              | X    | X    | X    | A 1        |
| SM                    | CT2  | CT1  | C    | 0.149  | 3 | 0.00   | ! | X                              | X    | X    | X    | A 1        |
| SM                    | CTL2 | CTL1 | HAL1 | 0.064  | 3 | 0.00   | ! | X                              | R    | X    | X    | A 2        |
| SM                    | CT2  | CT1  | HB   | 0.064  | 3 | 0.00   | ! | -                              | -    | -    | -    | 0          |
| !dih2-dih4            |      |      |      |        |   |        |   |                                |      |      |      |            |
| !SM                   | SM   | CT2  | CT1  | 0.31   | 3 | 0.00   | ! | X                              | R    | X    | X    | A 2        |
| !SM                   | SM   | CTL2 | CTL1 | 0.31   | 3 | 0.00   | ! | -                              | -    | -    | -    | 0          |
| ! do not change       |      |      |      |        |   |        |   |                                |      |      |      |            |
| !SM                   | SM   | CT2  | HA   | 0.1580 | 3 | 0.00   | ! | X                              | X    | X    | X    | A 1        |
| !SM                   | SM   | CTL2 | HAL2 | 0.1580 | 3 | 0.00   | ! | -                              | -    | -    | -    | 0          |

```

!uses
!X   CTL1 CTL2 X       0.200  3   0.00 ! alkane, 3/92
!HAL2 CTL2 CEL1 CTL1   0.000  3   0.00 ! X X X P 1 (OK to use cholesterol)
!
HAL2 CTL2 CTL1 CTL3    0.1200  3   0.00 ! lkr5 dih5
!
!THIS HAS TO BE DONE AND : HAL3 CTL3 CEL1 CTL1    0.0600  3  0.0
!LARGER THAN THE EXISTING: HAL2 CTL2 CEL1 CTL1    0.0300  3  0.0
!POTENTIAL PROBLEM!!!
!
!
!take
!CTL3 CEL1 CEL1 HEL1    1.0000  2  180.00 ! 2-butene, adm jr., 8/98 update
CTL2 CEL1 CEL1 HEL1    1.0000  2  180.00 ! " "
CTL1 CEL1 CEL1 HEL1    1.0000  2  180.00 ! " "
!CTL2 CEL1 CTL1 CTL3    0.00    3  180.0  ! br12
!
!compare
!HEL1 CEL1 CTL2 CTL2    0.1200  3   0.00 ! butene, yin,adm jr., 12/95
!HEL1 CEL1 CTL2 CTL3    0.1200  3   0.00 ! butene, yin,adm jr., 12/95
HEL1 CEL1 CTL1 CTL3    0.1200  3   0.00 ! butene, yin,adm jr., 12/95
!

IMPROPER
CTL1 CEL1 CEL1 CTL3    4.193  0  180.00 ! X X X P 2
CTL1 CEL1 CEL1 CTL2    4.193  0  180.00 ! - - - - 0
CTL1 CEL1 CEL1 HEL1    9.878  0  180.00 ! X X X P 1

NONBONDED
!nitroxide
NN      0.0      -0.20      1.85  ! as all other nitogens
ON      0.0      -0.1521     1.77
ONr     0.0      -0.1521     1.77

END

return

```
