# Supplementary material
Source: PubMed Central journal article supplement (PMC2766176)
Supplement: NIHMS128751-supplement-Supp_3.pdf [file NIHMS128751-supplement-Supp_3.pdf]

\*stream file for R1 cmap parameters

\*

read param card append

\* SLX

\*

CMAP

| CEL1      | CEL1      | CTL2      | SM        | CEL1      | CTL2 | SM | SM | 12 |
|-----------|-----------|-----------|-----------|-----------|------|----|----|----|
| !r1 cmap  |           |           |           |           |      |    |    |    |
| ! -180.0  |           |           |           |           |      |    |    |    |
| 2.358500  | 2.399450  | 2.438250  | 1.477750  | 0.316250  |      |    |    |    |
| -1.122600 | -2.924300 | -1.122600 | 0.316250  | 1.477750  |      |    |    |    |
| 2.438250  | 2.399450  |           |           |           |      |    |    |    |
| ! -150.0  |           |           |           |           |      |    |    |    |
| 0.400750  | 0.661800  | 0.651400  | 0.379950  | -1.587150 |      |    |    |    |
| -3.304950 | -2.133000 | -0.907000 | -0.796800 | 0.320100  |      |    |    |    |
| 0.819950  | 0.793850  |           |           |           |      |    |    |    |
| ! -120.0  |           |           |           |           |      |    |    |    |
| -0.429400 | -0.103400 | -0.023200 | -1.043250 | -2.155050 |      |    |    |    |
| -0.983100 | -0.486950 | -0.866250 | -0.524550 | -0.272550 |      |    |    |    |
| -0.068900 | -0.269050 |           |           |           |      |    |    |    |
| ! -90.0   |           |           |           |           |      |    |    |    |
| -0.011300 | 0.192750  | 0.118500  | 0.307850  | 1.454700  |      |    |    |    |
| 1.297300  | 0.421000  | 0.122450  | -0.068200 | 0.437750  |      |    |    |    |
| 0.848100  | 0.480250  |           |           |           |      |    |    |    |
| ! -60.0   |           |           |           |           |      |    |    |    |
| 0.006650  | 0.732450  | 1.608600  | 1.970050  | 1.863050  |      |    |    |    |
| 1.261600  | 0.627600  | 0.582650  | 0.923650  | 1.437400  |      |    |    |    |
| 1.476100  | 0.615100  |           |           |           |      |    |    |    |
| ! -30.0   |           |           |           |           |      |    |    |    |
| -0.286950 | 0.507900  | 0.767750  | 0.459850  | -0.070250 |      |    |    |    |
| 0.026850  | -0.117250 | -0.187200 | 0.170750  | -0.091200 |      |    |    |    |
| -0.181850 | -0.508950 |           |           |           |      |    |    |    |
| ! 0.0     |           |           |           |           |      |    |    |    |
| -0.514300 | -0.564250 | -0.766600 | -0.930950 | -0.936500 |      |    |    |    |
| -0.692050 | -1.160300 | -0.692050 | -0.936500 | -0.930950 |      |    |    |    |
| -0.766600 | -0.564250 |           |           |           |      |    |    |    |
| ! 30.0    |           |           |           |           |      |    |    |    |
| -0.286950 | -0.508950 | -0.181850 | -0.091200 | 0.170750  |      |    |    |    |
| -0.187200 | -0.117250 | 0.026850  | -0.070250 | 0.459850  |      |    |    |    |
| 0.767750  | 0.507900  |           |           |           |      |    |    |    |
| ! 60.0    |           |           |           |           |      |    |    |    |
| 0.006650  | 0.615100  | 1.476100  | 1.437400  | 0.923650  |      |    |    |    |
| 0.582650  | 0.627600  | 1.261600  | 1.863050  | 1.970050  |      |    |    |    |
| 1.608600  | 0.732450  |           |           |           |      |    |    |    |
| ! 90.0    |           |           |           |           |      |    |    |    |

```

-0.011300  0.480250  0.848100  0.437750 -0.068200
 0.122450  0.421000  1.297300  1.454700  0.307850
 0.118500  0.192750

! 120.0
-0.429400 -0.269050 -0.068900 -0.272550 -0.524550
-0.866250 -0.486950 -0.983100 -2.155050 -1.043250
-0.023200 -0.103400

! 150.0
 0.400750  0.793850  0.819950  0.320100 -0.796950
-0.906950 -2.133000 -3.304950 -1.587400  0.379950
 0.651400  0.661800

CTL1 CTL1 CTL2 SM      CTL1 CTL2 SM      SM      12
!r5 cmap
! -180.0
 0.326800  0.391900  0.132600 -0.193900  0.075000
-0.515500 -0.494900 -0.096900  0.208500 -0.183100
-0.255800 -0.005250

! -150.0
 0.532400  0.258000  0.183950  0.129100  0.653450
 0.788250  0.513950  0.462900  0.790600  0.723300
 0.595500  0.694250

! -120.0
 0.100900  0.070800  0.141250  0.406150  0.593450
 0.148150 -0.714950  0.583800  1.085000  0.296350
 0.168600  0.379850

! -90.0
 0.237600  0.157050  0.110000  0.350000  0.418000
-0.221450 -0.020400 -1.108650 -1.661750 -0.574950
 0.480900  0.490550

! -60.0
 0.483850  0.080550 -0.067550  0.222400  0.064450
-0.287100 -2.273750 -2.890150 -1.485950  0.136050
 1.013300  0.990850

! -30.0
 1.056500  0.455350  0.092550  0.039750 -0.446100
-2.239400 -3.664400 -3.188950 -1.461150 -0.010350
 0.722750  1.535150

! 0.0
 0.297900 -0.184000 -0.038100 -0.331350 -1.336800
-3.498250 -4.944750 -4.182900 -2.311050 -0.589200
 0.795100  0.900800

! 30.0
-0.692400  0.051650  0.229850 -0.318000 -2.264500
-4.437150 -6.106950 -3.620550 -0.952950 -0.210300
-0.164550 -0.669650

```

! 60.0  
0.232400 1.060900 0.046550 -2.025900 -3.747950  
-4.395350 -2.648550 -0.981250 0.119250 -0.528650  
-1.055200 -0.897850

! 90.0  
1.198600 1.212000 0.227300 -0.463000 -0.572750  
-1.127650 -1.412400 -0.411500 0.433250 -0.015800  
0.225650 0.794400

! 120.0  
0.897850 1.118250 0.868800 1.007050 0.159550  
-1.027750 -1.105550 -0.597100 -0.395100 -0.085550  
0.549850 0.783150

! 150.0  
0.452650 0.684650 0.624900 0.047800 -0.193350  
-0.620400 -1.803000 -1.558350 -0.718700 -0.113650  
-0.147750 0.130950

NH1 CT1 CT2 SM CT1 CT2 SM SM 12

!adds cmap

! -180.0  
-0.178600 0.777600 1.057250 -0.395900 -0.842300  
0.021150 1.265600 -0.100000 -0.775750 0.085900  
-0.107800 -0.379100

! -150.0  
0.631550 1.153100 0.260150 -1.022150 0.311400  
1.411000 0.320500 -0.675000 0.436250 0.521500  
0.034500 0.091000

! -120.0  
-0.308300 -0.104050 -0.937950 -1.103300 0.067650  
-0.775800 -2.071700 -0.678300 -0.131800 -0.477000  
-0.652950 -0.453050

! -90.0  
-0.065550 0.058850 -0.334250 -0.205550 -0.059850  
-0.800200 -0.240200 0.602150 -0.150850 -0.893450  
-0.588200 -0.409900

! -60.0  
0.796750 1.164200 0.977400 0.499900 0.161700  
0.454900 1.804950 1.677250 0.607500 0.564550  
0.608700 0.432150

! -30.0  
2.225100 2.828000 1.720500 0.500300 0.445300  
2.132450 2.128150 1.627750 2.237900 2.292250  
1.090400 1.410050

! 0.0  
3.471450 2.416650 0.703850 0.311100 1.745250  
1.659500 0.602700 1.741500 2.339250 1.095950  
0.609700 2.165250

```
! 30.0
 2.649250  1.530150  0.875750  1.933150  2.308250
 1.993500  2.337700  2.267950  1.466750  0.569500
 1.635000  3.272050
```

```
! 60.0
 1.290800  0.125900  0.182300  0.730700  1.712400
 1.941250  1.323300  0.701900  0.351650  0.218850
 1.701050  2.119250
```

```
! 90.0
 0.192050 -0.050750  0.076400  0.109700 -0.132300
 0.432750  0.085050 -0.557700  0.213900 -0.003400
 0.579550  0.806950
```

```
! 120.0
-0.564150 -0.785050 -1.166700 -1.716300 -0.868450
-0.961350 -2.520200 -1.396600 -0.705100 -2.088800
-1.682650 -0.922050
```

```
! 150.0
-1.272000 -0.959300 -0.797100 -0.470400 -0.952850
-2.219150 -1.613850 -0.195800 -2.266700 -2.141550
-1.242500 -0.849750
```

END

return
