# Supplementary material
Source: PubMed Central journal article supplement (PMC2766176)
Supplement: NIHMS128751-supplement-Supp_4.pdf [file NIHMS128751-supplement-Supp_4.pdf]

SM SM CTL3 72.500 103.3000 ! ALLOW ALI SUL ION  
! expt. dimethyldisulfide, 3/26/92 (FL)

DIHEDRALS

!  
!V(dihedral) = Kchi(1 - cos(n(chi) - delta))  
!  
!Kchi: kcal/mole  
!n: multiplicity  
!delta: degrees  
!  
!atom types Kchi n delta  
!  
!cholesterol  
!CTL1 CTL2 CEL1 CTL1 0.30 3 180.0 ! torR1  
!CTL2 CEL1 CTL1 CTL1 0.00 3 180.0 ! bR12  
!CTL2 CEL1 CTL1 CTL3 0.00 3 180.0 ! bR12  
!CTL2 CEL1 CTL1 CTL2 0.30 3 180.0 ! torR1  
!HAL2 CTL2 CEL1 CTL1 0.0300 3 0.0 ! CH2 wag and twist, from CEL1 CEL1  
CTL2 HAL2  
!CEL1 CEL1 CTL2 CTL1 0.5000 1 180.0 ! torR2, CEL1 CEL1 CTL2 CTL2  
!CEL1 CEL1 CTL2 CTL1 1.3000 3 180.0 !  
!CEL1 CEL1 CTL1 CTL1 0.5000 1 180.0 ! torR2, CEL1 CEL1 CTL2 CTL2  
!CEL1 CEL1 CTL1 CTL1 1.3000 3 180.0 !  
!CEL1 CEL1 CTL1 CTL2 0.5000 1 180.0 ! bR12, CEL1 CEL1 CTL2 CTL2  
!CEL1 CEL1 CTL1 CTL2 1.3000 3 180.0 !  
!CEL1 CEL1 CTL1 CTL3 0.5000 1 180.0 ! bR13, rCH3, CEL1 CEL1 CTL2 CTL2  
!CEL1 CEL1 CTL1 CTL3 1.3000 3 180.0 !  
!HEL1 CEL1 CTL2 CTL1 0.00 3 0.0 ! wC9H, HEL1 CEL1 CTL2 CTL2  
!disulfide  
CT2 SM SM CTL2 1.0000 1 0.00 ! ALLOW ALI SUL ION  
CT2 SM SM CTL2 4.1000 2 0.00 ! ALLOW ALI SUL ION  
CT2 SM SM CTL2 0.9000 3 0.00 ! ALLOW ALI SUL ION  
CT2 SM SM CTL3 1.0000 1 0.00 ! ALLOW ALI SUL ION  
CT2 SM SM CTL3 4.1000 2 0.00 ! ALLOW ALI SUL ION  
CT2 SM SM CTL3 0.9000 3 0.00 ! ALLOW ALI SUL ION  
CTL3 SM SM CTL2 1.0000 1 0.00 ! ALLOW ALI SUL ION  
CTL3 SM SM CTL2 4.1000 2 0.00 ! ALLOW ALI SUL ION  
CTL3 SM SM CTL2 0.9000 3 0.00 ! ALLOW ALI SUL ION  
SM SM CTL2 CTL2 0.3100 3 0.00 ! ALLOW SUL ALI  
SM SM CTL2 CTL1 0.3100 3 0.00 ! ALLOW SUL ALI  
SM SM CTL2 HAL2 0.1580 3 0.00 ! ALLOW ALI SUL ION  
SM SM CTL3 HAL3 0.1580 3 0.00 ! ALLOW ALI SUL ION  
SM CTL2 CTL2 HAL2 0.0100 3 0.00 ! ALLOW ALI SUL ION

IMPROPER

!  
!V(improper) = Kpsi(psi - psi0)\*\*2  
!  
!Kpsi: kcal/mole/rad\*\*2  
!psi0: degrees  
!note that the second column of numbers (0) is ignored  
!  
!atom types Kpsi psi0  
!

END
